# Supplementary material
Source: PubMed Central journal article supplement (PMC4786489)
Supplement: NIHMS748596-supplement-2.pdf [file NIHMS748596-supplement-2.pdf]

**Supplementary Table 1. Summary of the frequencies of indels, correction of *OTC spf<sup>ash</sup>* mutation, and HDR in animals treated with the dual AAV gene-targeting vectors.**

| <b>ID</b> | <b>Treatment</b>                   | <b>Time after treatment (week)</b> | <b>Indel (%)</b> | <b>OTC reads with a 'G' (%)</b> | <b>Reads with Perfect HDR (%)</b> | <b>Reads with Partial HDR (%)</b> |
|-----------|------------------------------------|------------------------------------|------------------|---------------------------------|-----------------------------------|-----------------------------------|
| 4001      | Neonatal, sgRNA1                   | 3                                  | 26.5             | 20.1                            | 17.2                              | 7.6                               |
| 4003      | Neonatal, sgRNA1                   | 3                                  | 35.5             | 7.2                             | 6.4                               | 2.7                               |
| 307       | Neonatal, sgRNA1                   | 3                                  | 30.5             | 8.9                             | 7.2                               | 2.9                               |
| 835       | Neonatal, sgRNA1                   | 8                                  | 26.7             | 6.8                             | 5.5                               | 2.2                               |
| 836       | Neonatal, sgRNA1                   | 8                                  | 29.6             | 10.8                            | 8.9                               | 3.3                               |
| 844       | Neonatal, sgRNA1                   | 8                                  | 34.4             | 6.7                             | 5.4                               | 2.4                               |
| 630       | Adult, untargeted, low dose        | 3                                  | 0.3              | 0.02                            | 0.01                              | 0.01                              |
| 637       | Adult, sgRNA1, low dose            | 3                                  | 50.3             | 0.3                             | 0.2                               | 0.1                               |
| 640       | Adult, sgRNA1, low dose            | 3                                  | 45.0             | 0.3                             | 0.3                               | 0.1                               |
| 641       | Adult, sgRNA1, low dose            | 3                                  | 38.5             | 0.2                             | 0.1                               | 0.04                              |
| 658       | Adult, untargeted, high dose       | 2                                  | 0.1              | 0.03                            | 0.02                              | 0.01                              |
| 648       | Adult, sgRNA1, high dose           | 2                                  | 43.6             | 1.8                             | 1.5                               | 0.3                               |
| 649       | Adult, sgRNA1, high dose           | 2                                  | 48.5             | 2.1                             | 1.7                               | 0.4                               |
| 653       | Adult, sgRNA1, high dose           | 2                                  | 34.0             | 1.3                             | 1.1                               | 0.2                               |
|           | Untreated <i>spf<sup>ash</sup></i> | n/a                                | 0.04             | 0.002                           | 0.001                             | 0.004                             |

**Supplementary Table 2. A full list of simple indels (insertions or deletions) detected by deep sequencing on the *OTC* target region in the liver of two *spf<sup>ash</sup>* mice (#4001 and #4003) 3 weeks after neonatal injection of the sgRNA1 dual AAV vectors, and two adult *spf<sup>ash</sup>* mice (#648 and #653) 2 weeks after injection of high-dose sgRNA1 dual AAV vectors. The rates of complex indels (insertions + deletions) are also indicated. Please see attached Excel file.**

**Supplementary Table 3. Deletion sizes identified by on-target deep sequencing and their distribution in neonatal-treated and adult-treated animals.**

| Size range                | Neonatal (3w) |       | Adult (high-dose, 2w) |       |
|---------------------------|---------------|-------|-----------------------|-------|
|                           | #4001         | #4003 | #648                  | #653  |
| 0-10 bp                   | 82.12         | 89.78 | 86.10                 | 86.55 |
| 11-20 bp                  | 7.45          | 4.99  | 2.29                  | 2.41  |
| 21-30 bp                  | 5.55          | 2.84  | 0.90                  | 0.79  |
| 31-40 bp                  | 2.00          | 1.07  | 0.50                  | 0.31  |
| 41-50 bp                  | 0.73          | 0.22  | 0.23                  | 0.59  |
| 51-60 bp                  | 0.37          | 0.17  | 0.06                  | 0.24  |
| 61-70 bp                  | 0.35          | 0.11  | 0.21                  | 0.24  |
| 71-80 bp                  | 0.18          | 0.09  | 0.12                  | 0.22  |
| 81-90 bp                  | 0.09          | 0.03  | 0.14                  | 0.15  |
| 91-100 bp                 | 0.09          | 0.04  | 0.21                  | 0.12  |
| >100 bp                   | 1.08          | 0.66  | 9.24                  | 8.38  |
| Indel overlap with Exon 4 | 1.36          | 0.72  | 7.76                  | 5.18  |

**Supplementary Table 4. Off-target analysis.** Potential off-target sequences for sgRNA1 identified and scored by Benchling's off-target analysis.

| ID     | Sequence             | PAM   | Score | Chromosome | Strand | Position  | Mismatches | On-target | Indel (treated) | Indel (untreated ctl) |
|--------|----------------------|-------|-------|------------|--------|-----------|------------|-----------|-----------------|-----------------------|
| sgRNA1 | TCTCTTTTAAACTAACCCAT | CAGAG | 100   | X          | -      | 10276774  | 0          | TRUE      |                 |                       |
| OT1    | TATCTTTTCAACTAACCCAA | TAGGA | 1.144 | 17         | -      | 58464514  | 3          | FALSE     | 0.00034         | 0.00038               |
| OT2    | TTTCTTTTACTAGCCCAT   | AGGGG | 0.864 | X          | -      | 10299926  | 3          | FALSE     | 0.00040         | 0.00033               |
| OT3    | TCTTTTTTAAATAACCCAT  | TAGAA | 0.861 | 8          | -      | 113731689 | 3          | FALSE     | 0.0011          | 0.0011                |
| OT4    | TGGCATTAAACTAACCCAA  | CTGGG | 0.847 | 5          | -      | 30737756  | 4          | FALSE     | 0.00020         | 0.00017               |
| OT5    | TCTTCATGAAACTAACCCAT | CTGAA | 0.832 | 19         | +      | 14415840  | 4          | FALSE     | 0.00019         | 0.00023               |
| OT6    | ATTTTTTAAACAACCCAT   | CTGGA | 0.66  | 2          | -      | 102196549 | 4          | FALSE     | 0.0010          | 0.0011                |
| OT7    | GATCTTGAATCTAACCCAT  | GTGAA | 0.628 | 6          | +      | 87522107  | 4          | FALSE     | 0.00018         | 0.00018               |
| OT8    | CCTTTATAATCTAACCCAT  | GTGAA | 0.617 | 9          | -      | 91587078  | 4          | FALSE     | 0.00034         | 0.00032               |
| OT9    | TCTGTTTTAAAGTAACCCTT | CAGGG | 0.595 | 1          | -      | 88987170  | 3          | FALSE     | 0.00020         | 0.00022               |
| OT10   | TTGCTTTTCAACTAACCCAA | GTGGG | 0.542 | 8          | -      | 108010534 | 4          | FALSE     | 0.00025         | 0.00024               |
| OT11   | AATATTTTAAACTATCCCAT | GTGAG | 0.485 | 12         | -      | 4955834   | 4          | FALSE     | 0.00021         | 0.00020               |
| OT12   | TTACTTTAAACTATCCCAT  | CTGAA | 0.478 | X          | -      | 145956518 | 4          | FALSE     | 0.00022         | 0.00022               |
| OT13   | ACACTTTTAAAATAACCCAG | ATGAA | 0.471 | 8          | -      | 28090672  | 4          | FALSE     | 0.00033         | 0.00033               |
| OT14   | AATCTTCTAAACCAACCCAT | TGGAG | 0.464 | 6          | +      | 44013659  | 4          | FALSE     | 0.00023         | 0.00017               |
| OT15   | TCTTTATTAGACTAACCCAG | CTGAG | 0.457 | X          | -      | 152025104 | 4          | FALSE     | 0.00035         | 0.00036               |
| OT16   | TTTCATTTAACATAACCCAT | ATGGA | 0.456 | 15         | +      | 35702518  | 4          | FALSE     | 0.00014         | 0.00018               |

**Supplementary Table 5. Primers and sequences for construction and analysis of the donor template and sgRNA plasmids.**

| Name                                       | Sequence (5'->3')                                                                                                               | Note                                          |
|--------------------------------------------|---------------------------------------------------------------------------------------------------------------------------------|-----------------------------------------------|
| WT sequence                                | GAAAGTCTCACAGACACCGCTC <b>GG</b> TTTGAAAACTTTTCTTCCTTCCAAAGTTT-----<br>ATTTCAAACCTGTGATGGGTTAGTTTAAAAGAGAAGATG                  | Part of <u>OTC exon 4</u> and intron 4        |
| <i>spf<sup>esh</sup></i> sequence          | GAAAGTCTCACAGACACCGCTC <b>A</b> GGTTTGAAAACTTTTCTTCCTTCCAAAGTTT-----<br>ATTTCAAACCTGTGATGGGTTAGTTTAAAAGAGAAGATG                 | <i>spf<sup>esh</sup></i> G->A mutation        |
| OTC donor sequence for sgRNA1 (892-989 bp) | GAAAGTCTCACAGACACCGCTC <b>GG</b> TTTGAAAACTTTTCTTCCTTCCAAAGTTT <b>ACCGGT</b><br>ATTTCAAT <b>TGGT</b> GATGGGTTAGTTTAAAAGAGAAGATG | PAM mutation; AgeI Restriction site insertion |
| OTC sgRNA1_Fwd                             | <b>CACC</b> GTCTCTTTTAAACTAACCCAT                                                                                               | OTC target sequence 1                         |
| OTC sgRNA1_Rev                             | <b>AAAC</b> ATGGGTTAGTTTAAAAGAGAC                                                                                               |                                               |
| OTC sgRNA2_Fwd                             | <b>CACC</b> GCACAAGACATTCACCTGGGT                                                                                               | OTC target sequence 2                         |
| OTC sgRNA2_Rev                             | <b>AAAC</b> ACCCAAGTGAATGTCTTGTGC                                                                                               |                                               |
| OTC sgRNA3_Fwd                             | <b>CACC</b> GAAAGTTTATTTCAAACCTCG                                                                                               | OTC target sequence 3                         |
| OTC sgRNA3_Rev                             | <b>AAAC</b> CAGAGTTTGAATAAACTTTC                                                                                                |                                               |
| HDR-Fwd                                    | TGGAGCAATTCTGCACATGGA                                                                                                           | OTC PCR for RFLP analysis                     |
| HDR-Rev                                    | CTTACTGAACATGGCAGTTTCCC                                                                                                         |                                               |
| OTC_PointM_F                               | GGCTATGCTTGGGAATGTCCT                                                                                                           | OTC PCR for Surveyor assay                    |
| OTC_PointM_R                               | GCTACAGAATGAAAGAGAGGCG                                                                                                          |                                               |

**Supplementary Table 6. PCR primer sequences for detecting potential off-target effects by deep sequencing.**

| <b>Primer Name</b> | <b>Sequence (5'-&gt;3')</b> | <b>Note</b>     |
|--------------------|-----------------------------|-----------------|
| OTC_OT1F1          | CTGGTGCCTTTTTCTATCGCC       | Primers for OT1 |
| OTC_OT1R1          | CCAAGAGCAACTACAATGGCTT      |                 |
| OTC_OT1F2          | GCATTTTCATGAGCATTCCA        |                 |
| OTC_OT1R2          | CATGTTGTGCCTGCATCTCT        |                 |
| OTC_OT2F1          | GCAGACTCCAAGATGCAAGAC       | Primers for OT2 |
| OTC_OT2R1          | GATGTTGTTCCACCCGCATCT       |                 |
| OTC_OT2F2          | CACTGAGCCAAGTCACTGGA        |                 |
| OTC_OT2R2          | AGGGACAAAACCAAACAGCA        |                 |
| OTC_OT3F1          | TGGCCTTCTAAAGCAACCAA        | Primers for OT3 |
| OTC_OT3R1          | CCGTCTCCAGATCACATGAC        |                 |
| OTC_OT3F2          | ATAACTCATAATCTATGCATGGCACAA |                 |
| OTC_OT3R2          | TTTGATCATGGTGTTTATCAGAGC    |                 |
| OTC_OT4F1          | TTGAGACCTAGCTCATGCC         | Primers for OT4 |
| OTC_OT4R1          | TAACGCAGAAGTGGCACAGG        |                 |
| OTC_OT4F2          | TCAGCTTCGAATCACACCAG        |                 |
| OTC_OT4R2          | GAATGTGGCATTGGCTTTTT        |                 |
| OTC_OT5F1          | GTCCCCGACAAACCAAGCTA        | Primers for OT5 |
| OTC_OT5R1          | TGAACTGGCAGTATGCAGGG        |                 |
| OTC_OT5F2          | AACATGGTTTCTGCCCTCAG        |                 |
| OTC_OT5R2          | GGACCATGCCGAACCTTAC         |                 |
| OTC_OT6F1          | GAGAGAGCCAATCTGCCCAT        | Primers for OT6 |
| OTC_OT6R1          | CACCGGAAACGTGTGAGAGA        |                 |
| OTC_OT6F2          | ACTTCCCATGATCCCATTGA        |                 |
| OTC_OT6R2          | AGCTTCCCTCCAAGTGCCT         |                 |
| OTC_OT7F1          | GATGGGCATAAGCCCGAAGTA       | Primers for OT7 |
| OTC_OT7R1          | TAAGGCCAGTGTTGTTGTGT        |                 |
| OTC_OT7F2          | GTAGCAGGGGCTCTGTGAAG        |                 |
| OTC_OT7R2          | TGGCCTGAAATACCCAGAAC        |                 |
| OTC_OT8F1          | GTTGAATTCGCGTGTCCAGG        | Primers for OT8 |
| OTC_OT8R1          | TCCCATGGCGAGAATGTCAC        |                 |
| OTC_OT8F2          | CCCTGTAGGAAACACAGAGGA       |                 |
| OTC_OT8R2          | TGCTTTGGATGTTGATTCTAAA      |                 |
| OTC_OT9F1          | GGCAAAGGACTAGCTTGCAC        | Primers for OT9 |
| OTC_OT9R1          | GGGTGCTATGAGGACCAGTG        |                 |
| OTC_OT9F2          | CAGTGGTGTGTGGAGAGCTG        |                 |
| OTC_OT9R2          | AGAGAGAGCGCTTGA             |                 |

| <b>Primer Name</b> | <b>Sequence (5'-&gt;3')</b> | <b>Note</b>      |
|--------------------|-----------------------------|------------------|
| OTC_OT10F1         | CTTTGACTCCCGGCGAAAGA        |                  |
| OTC_OT10R1         | TTGTCCATCCGGGTCATTGC        | Primers for OT10 |
| OTC_OT10F2         | AAGTCCTTCTTGCCCAACTT        |                  |
| OTC_OT10R2         | CAGCCCAATGCATTTTT           |                  |
| OTC_OT11F1         | ATTACAGGTCCTGGTTGGGC        |                  |
| OTC_OT11R1         | ACTGAGCCTGGTAGAGCCTT        | Primers for OT11 |
| OTC_OT11F2         | GGAAGGTGAAGGAAGGAAGG        |                  |
| OTC_OT11R2         | TTTTCTAGGAATTCAGGACATACA    |                  |
| OTC_OT12F          | TCATGGTCCTTAAAAATTTTGC      |                  |
| OTC_OT12R          | TCCAGGTATGCAAAGTGGAT        | Primers for OT12 |
| OTC_OT13F1         | TTCAGTTGTACTTTGGATGCTCTGA   |                  |
| OTC_OT13R1         | CATCTGAATAGCAGCAGGCG        | Primers for OT13 |
| OTC_OT13F2         | TAGCACAGCCCAATGACTT         |                  |
| OTC_OT13R2         | TCATGAAACCCATAATCAGAA       |                  |
| OTC_OT14F1         | AGTGGGTCATCCTTTGTTACCC      |                  |
| OTC_OT14R1         | TGCCAGTTATCAGCCAAGCA        | Primers for OT14 |
| OTC_OT14F2         | CCCAGGAACTTAACTCAGGTG       |                  |
| OTC_OT14R2         | TGCCATTTGACCTCATAAGTCT      |                  |
| OTC_OT15F1         | TTCAGCCCCCTTGAGTGTTTA       |                  |
| OTC_OT15R1         | GTCTCTGAGCACAAAGAGACGA      | Primers for OT15 |
| OTC_OT15F2         | TTGCCTGTCCCAACTAGAGC        |                  |
| OTC_OT15R2         | GGCCCAAGAATGCACATTTA        |                  |
| OTC_OT16F1         | CCACACACTGGCTAGGACTG        |                  |
| OTC_OT16R1         | ACTGGCAGCACTTGAGACAA        | Primers for OT16 |
| OTC_OT16F2         | GATGGCATGCTGTGGTTTTT        |                  |
| OTC_OT16R2         | CAATGCTTCCACACAGAACC        |                  |
